# Supplementary material
Source: PubMed Central journal article supplement (PMC11626277)
Supplement: ajcr0014-5568-f2.pdf [file ajcr0014-5568-f2.pdf]

## miRNA and breast cancer

**Supplementary Table 1.** Associations between ex-miRNAs and incident breast cancer

| exRNA    | N_analyzed | Event | Censored | PctCens     | DF | Estimate     | StdErr      | ChiSq       | ProbChiSq   | HazardRatio | HRLowerCL   | HRUpperCL   | covariate              | panel |
|----------|------------|-------|----------|-------------|----|--------------|-------------|-------------|-------------|-------------|-------------|-------------|------------------------|-------|
| _100_5p  | 3538       | 44    | 3494     | 98.75635953 | 1  | -0.086288195 | 0.082053705 | 1.105875871 | 0.292980203 | 0.917329823 | 0.781054381 | 1.077382093 | age1 sex bmi1 currsmk1 | 1     |
| _101_3p  | 3685       | 51    | 3634     | 98.61601085 | 1  | -0.111043438 | 0.087794192 | 1.59975779  | 0.205937539 | 0.894899875 | 0.753431713 | 1.062930818 | age1 sex bmi1 currsmk1 | 1     |
| _103a_3p | 2877       | 39    | 2838     | 98.64442127 | 1  | 0.02953847   | 0.079347514 | 0.1385828   | 0.709693985 | 1.029979058 | 0.881632656 | 1.203286712 | age1 sex bmi1 currsmk1 | 1     |
| _106b_3p | 3555       | 50    | 3505     | 98.59353024 | 1  | 0.051515776  | 0.088619498 | 0.337926243 | 0.561028687 | 1.052865796 | 0.884993261 | 1.252581725 | age1 sex bmi1 currsmk1 | 1     |
| _106b_5p | 1976       | 20    | 1956     | 98.98785425 | 1  | -0.057791112 | 0.152718338 | 0.143198912 | 0.705121346 | 0.943847085 | 0.69969304  | 1.273197345 | age1 sex bmi1 currsmk1 | 1     |
| _107     | 3089       | 40    | 3049     | 98.70508255 | 1  | -0.064760785 | 0.106904106 | 0.366974115 | 0.544658272 | 0.937291651 | 0.760112384 | 1.155770722 | age1 sex bmi1 currsmk1 | 1     |
| _10a_5p  | 3021       | 47    | 2974     | 98.44422377 | 1  | -0.049816626 | 0.100270093 | 0.246834453 | 0.61931291  | 0.951403872 | 0.781654543 | 1.158017099 | age1 sex bmi1 currsmk1 | 1     |
| _125a_5p | 3876       | 55    | 3821     | 98.58101135 | 1  | -0.035562581 | 0.085010453 | 0.175001544 | 0.6757045   | 0.965062338 | 0.816947859 | 1.140030304 | age1 sex bmi1 currsmk1 | 1     |
| _125b_5p | 3889       | 55    | 3834     | 98.58575469 | 1  | -0.065197483 | 0.09003819  | 0.524334149 | 0.46899869  | 0.936882427 | 0.785316001 | 1.117701257 | age1 sex bmi1 currsmk1 | 1     |
| _126_3p  | 3789       | 54    | 3735     | 98.57482185 | 1  | -0.044145923 | 0.106571417 | 0.17159306  | 0.678699868 | 0.956814326 | 0.776450752 | 1.17907498  | age1 sex bmi1 currsmk1 | 1     |
| _126_5p  | 3892       | 55    | 3837     | 98.58684481 | 1  | -0.066379257 | 0.079597536 | 0.695449381 | 0.404317006 | 0.935775898 | 0.800605022 | 1.093768471 | age1 sex bmi1 currsmk1 | 1     |
| _130a_3p | 3682       | 51    | 3631     | 98.61488322 | 1  | -0.141502331 | 0.08645716  | 2.67870725  | 0.101698255 | 0.868053153 | 0.732746665 | 1.028344872 | age1 sex bmi1 currsmk1 | 1     |
| _140_3p  | 3679       | 52    | 3627     | 98.58657244 | 1  | -0.051978119 | 0.095835796 | 0.294161355 | 0.587566094 | 0.949349639 | 0.78677511  | 1.145517602 | age1 sex bmi1 currsmk1 | 1     |
| _142_5p  | 3483       | 49    | 3434     | 98.59316681 | 1  | -0.19474755  | 0.102431778 | 3.614719315 | 0.057270385 | 0.823042409 | 0.673336452 | 1.006033173 | age1 sex bmi1 currsmk1 | 1     |
| _143_3p  | 3755       | 54    | 3701     | 98.56191744 | 1  | -0.010087723 | 0.095248465 | 0.011216834 | 0.915654112 | 0.989962988 | 0.821378474 | 1.193148771 | age1 sex bmi1 currsmk1 | 1     |
| _144_5p  | 2328       | 27    | 2301     | 98.84020619 | 1  | 0.132118532  | 0.13426645  | 0.968261066 | 0.325114247 | 1.141243586 | 0.877183674 | 1.484793846 | age1 sex bmi1 currsmk1 | 1     |
| _145_5p  | 3843       | 55    | 3788     | 98.56882644 | 1  | -0.082765626 | 0.086737426 | 0.910514673 | 0.339977898 | 0.920566879 | 0.776648153 | 1.091154822 | age1 sex bmi1 currsmk1 | 1     |
| _146a_5p | 3903       | 55    | 3848     | 98.59082757 | 1  | -0.058748427 | 0.082736613 | 0.504193224 | 0.477663428 | 0.942943959 | 0.801789473 | 1.108948595 | age1 sex bmi1 currsmk1 | 1     |
| _148a_3p | 3840       | 55    | 3785     | 98.56770833 | 1  | -0.029238271 | 0.076581981 | 0.145763965 | 0.702616786 | 0.971185032 | 0.835824852 | 1.128466525 | age1 sex bmi1 currsmk1 | 1     |
| _150_5p  | 3892       | 55    | 3837     | 98.58684481 | 1  | -0.110145601 | 0.097323448 | 1.280853155 | 0.257740466 | 0.89570371  | 0.740154705 | 1.083942494 | age1 sex bmi1 currsmk1 | 1     |
| _151a_3p | 3796       | 55    | 3741     | 98.55110643 | 1  | 0.02962481   | 0.078106737 | 0.14385805  | 0.704475319 | 1.030067991 | 0.883855597 | 1.200467666 | age1 sex bmi1 currsmk1 | 1     |
| _151a_5p | 2122       | 30    | 2092     | 98.5862394  | 1  | 0.084950245  | 0.124844791 | 0.463007921 | 0.496221562 | 1.088662899 | 0.852364481 | 1.390469611 | age1 sex bmi1 currsmk1 | 1     |
| _15a_5p  | 3867       | 55    | 3812     | 98.57770882 | 1  | 0.003937005  | 0.072969501 | 0.002911047 | 0.956971718 | 1.003944765 | 0.870157901 | 1.158301373 | age1 sex bmi1 currsmk1 | 1     |
| _15b_3p  | 3724       | 52    | 3672     | 98.60365199 | 1  | 0.00710279   | 0.084513376 | 0.00706329  | 0.933021938 | 1.007128075 | 0.8533885   | 1.188564128 | age1 sex bmi1 currsmk1 | 1     |
| _16_5p   | 3890       | 55    | 3835     | 98.58611825 | 1  | -0.042105768 | 0.072252879 | 0.339604049 | 0.560057862 | 0.958768369 | 0.83216977  | 1.104626505 | age1 sex bmi1 currsmk1 | 1     |
| _181a_5p | 3324       | 47    | 3277     | 98.58604091 | 1  | -0.050984383 | 0.114019655 | 0.199946999 | 0.65476363  | 0.950293511 | 0.759983314 | 1.188259979 | age1 sex bmi1 currsmk1 | 1     |
| _182_5p  | 2218       | 25    | 2193     | 98.87285843 | 1  | 0.306320823  | 0.170515591 | 3.227192338 | 0.072424759 | 1.358418048 | 0.972501565 | 1.89747725  | age1 sex bmi1 currsmk1 | 1     |
| _185_5p  | 3840       | 55    | 3785     | 98.56770833 | 1  | 0.013947892  | 0.077185635 | 0.032654585 | 0.856598508 | 1.014045617 | 0.871679758 | 1.179663178 | age1 sex bmi1 currsmk1 | 1     |
| _18a_3p  | 2969       | 41    | 2928     | 98.61906366 | 1  | 0.095620411  | 0.090629916 | 1.113161193 | 0.291395806 | 1.100341307 | 0.921261861 | 1.314231104 | age1 sex bmi1 currsmk1 | 1     |
| _18a_5p  | 3190       | 46    | 3144     | 98.55799373 | 1  | 0.006786784  | 0.0936246   | 0.005254703 | 0.942212497 | 1.006809867 | 0.838019373 | 1.209597463 | age1 sex bmi1 currsmk1 | 1     |
| _191_5p  | 3787       | 54    | 3733     | 98.57406918 | 1  | -0.018273784 | 0.080813054 | 0.051132137 | 0.821104853 | 0.981892169 | 0.83806094  | 1.150408264 | age1 sex bmi1 currsmk1 | 1     |
| _192_5p  | 3679       | 52    | 3627     | 98.58657244 | 1  | -0.09193879  | 0.085158249 | 1.165585457 | 0.28031017  | 0.912160981 | 0.771941977 | 1.077849995 | age1 sex bmi1 currsmk1 | 1     |
| _194_5p  | 3606       | 51    | 3555     | 98.58569052 | 1  | -0.086894183 | 0.082383801 | 1.112494206 | 0.291540405 | 0.916774101 | 0.780076361 | 1.077426255 | age1 sex bmi1 currsmk1 | 1     |
| _199a_3p | 3908       | 55    | 3853     | 98.5926305  | 1  | -0.080202515 | 0.081801255 | 0.961293558 | 0.326861182 | 0.922929421 | 0.786211036 | 1.083422487 | age1 sex bmi1 currsmk1 | 1     |
| _199a_5p | 3649       | 52    | 3597     | 98.57495204 | 1  | -0.036238547 | 0.079760919 | 0.206424507 | 0.64958439  | 0.964410209 | 0.824838989 | 1.127598311 | age1 sex bmi1 currsmk1 | 1     |
| _19a_3p  | 3811       | 55    | 3756     | 98.55680924 | 1  | -0.014502376 | 0.06873163  | 0.044521013 | 0.832887247 | 0.985602277 | 0.861384849 | 1.127732685 | age1 sex bmi1 currsmk1 | 1     |
| _19b_3p  | 3537       | 50    | 3487     | 98.58637263 | 1  | 0.042173843  | 0.059370904 | 0.504590448 | 0.477490033 | 1.043075794 | 0.928494343 | 1.171797245 | age1 sex bmi1 currsmk1 | 1     |
| _20a_5p  | 3887       | 55    | 3832     | 98.58502701 | 1  | -0.039074392 | 0.073081968 | 0.285866973 | 0.592881327 | 0.961679165 | 0.833340949 | 1.109782038 | age1 sex bmi1 currsmk1 | 1     |
| _20b_5p  | 3687       | 54    | 3633     | 98.53539463 | 1  | 0.089817555  | 0.08782974  | 1.045777438 | 0.306481589 | 1.093974675 | 0.920972068 | 1.299475448 | age1 sex bmi1 currsmk1 | 1     |
| _21_3p   | 3675       | 50    | 3625     | 98.63945578 | 1  | -0.044529085 | 0.094586969 | 0.221628155 | 0.637802136 | 0.956447781 | 0.794600236 | 1.15126112  | age1 sex bmi1 currsmk1 | 1     |

## miRNA and breast cancer

|           |      |    |      |             |   |              |             |             |             |             |             |             |                         |   |
|-----------|------|----|------|-------------|---|--------------|-------------|-------------|-------------|-------------|-------------|-------------|-------------------------|---|
| _22_3p    | 3895 | 55 | 3840 | 98.58793325 | 1 | -0.066940743 | 0.077369195 | 0.74859153  | 0.386922527 | 0.93525062  | 0.803657916 | 1.0883906   | age1 sex bmi1 currrsmk1 | 1 |
| _22_5p    | 3657 | 52 | 3605 | 98.57806946 | 1 | 0.032208682  | 0.111065827 | 0.084097871 | 0.771819046 | 1.032732996 | 0.830708491 | 1.283888936 | age1 sex bmi1 currrsmk1 | 1 |
| _221_3p   | 3857 | 55 | 3802 | 98.57402126 | 1 | -0.090225224 | 0.087850208 | 1.054800559 | 0.30440406  | 0.913725369 | 0.769196767 | 1.085410243 | age1 sex bmi1 currrsmk1 | 1 |
| _221_5p   | 2906 | 45 | 2861 | 98.4514797  | 1 | 0.088184395  | 0.093064008 | 0.897883473 | 0.343349864 | 1.092189498 | 0.910084608 | 1.310732969 | age1 sex bmi1 currrsmk1 | 1 |
| _222_3p   | 3850 | 55 | 3795 | 98.57142857 | 1 | 0.001874898  | 0.082178101 | 0.000520527 | 0.981797798 | 1.001876657 | 0.852833265 | 1.176967265 | age1 sex bmi1 currrsmk1 | 1 |
| _223_3p   | 3887 | 55 | 3832 | 98.58502701 | 1 | -0.048660523 | 0.065146969 | 0.557911238 | 0.455103063 | 0.952504428 | 0.838327674 | 1.082231584 | age1 sex bmi1 currrsmk1 | 1 |
| _23a_3p   | 3723 | 52 | 3671 | 98.60327693 | 1 | -0.078515734 | 0.09140364  | 0.737881134 | 0.390340473 | 0.924487514 | 0.772855195 | 1.105869727 | age1 sex bmi1 currrsmk1 | 1 |
| _23b_3p   | 2154 | 30 | 2124 | 98.60724234 | 1 | -0.209638986 | 0.094207211 | 4.951944987 | 0.026061333 | 0.810876931 | 0.6741641   | 0.975313573 | age1 sex bmi1 currrsmk1 | 1 |
| _24_3p    | 3894 | 55 | 3839 | 98.58757062 | 1 | -0.052779326 | 0.077089455 | 0.468746173 | 0.493564554 | 0.948589318 | 0.815566854 | 1.103308319 | age1 sex bmi1 currrsmk1 | 1 |
| _25_3p    | 3897 | 55 | 3842 | 98.58865794 | 1 | -0.006828111 | 0.080122841 | 0.007262538 | 0.932086071 | 0.993195148 | 0.848855767 | 1.162077988 | age1 sex bmi1 currrsmk1 | 1 |
| _26a_5p   | 3781 | 54 | 3727 | 98.5718064  | 1 | -0.060554709 | 0.096496231 | 0.393799493 | 0.530308958 | 0.941242273 | 0.779047043 | 1.137206057 | age1 sex bmi1 currrsmk1 | 1 |
| _26b_5p   | 3859 | 55 | 3804 | 98.5747603  | 1 | -0.103909262 | 0.089785085 | 1.339368637 | 0.247145341 | 0.901307077 | 0.755870817 | 1.074726565 | age1 sex bmi1 currrsmk1 | 1 |
| _27a_3p   | 2843 | 36 | 2807 | 98.73373197 | 1 | -0.192435985 | 0.096704629 | 3.959843731 | 0.046598029 | 0.824947125 | 0.682513088 | 0.997105801 | age1 sex bmi1 currrsmk1 | 1 |
| _27b_3p   | 3334 | 49 | 3285 | 98.53029394 | 1 | -0.010716053 | 0.105628714 | 0.010292141 | 0.919193096 | 0.989341159 | 0.804330899 | 1.216907035 | age1 sex bmi1 currrsmk1 | 1 |
| _29a_3p   | 3793 | 52 | 3741 | 98.62905352 | 1 | -0.07003078  | 0.094281379 | 0.551729338 | 0.457611947 | 0.932365121 | 0.775056858 | 1.121601222 | age1 sex bmi1 currrsmk1 | 1 |
| _29b_2_5p | 3041 | 40 | 3001 | 98.68464321 | 1 | 0.003166519  | 0.076528824 | 0.001712041 | 0.966995494 | 1.003171538 | 0.863443151 | 1.165511746 | age1 sex bmi1 currrsmk1 | 1 |
| _29b_3p   | 3606 | 52 | 3554 | 98.55795896 | 1 | 0.055267478  | 0.103372428 | 0.285844512 | 0.592895855 | 1.056823254 | 0.863001579 | 1.294175371 | age1 sex bmi1 currrsmk1 | 1 |
| _29c_3p   | 3739 | 54 | 3685 | 98.55576357 | 1 | 0.037344304  | 0.095421233 | 0.153164697 | 0.695529221 | 1.038050364 | 0.860985275 | 1.251529602 | age1 sex bmi1 currrsmk1 | 1 |
| _30c_5p   | 3636 | 53 | 3583 | 98.54235424 | 1 | -0.015235701 | 0.104278018 | 0.021347123 | 0.883837278 | 0.984879775 | 0.802826332 | 1.208216686 | age1 sex bmi1 currrsmk1 | 1 |
| _30d_5p   | 3679 | 52 | 3627 | 98.58657244 | 1 | -0.086028228 | 0.089738957 | 0.919009326 | 0.337735225 | 0.91756833  | 0.769577704 | 1.094017714 | age1 sex bmi1 currrsmk1 | 1 |
| _30e_3p   | 2335 | 33 | 2302 | 98.58672377 | 1 | 0.022112287  | 0.101392011 | 0.047561972 | 0.827361268 | 1.022358576 | 0.838104569 | 1.247120104 | age1 sex bmi1 currrsmk1 | 1 |
| _320a_3p  | 3131 | 40 | 3091 | 98.72245289 | 1 | -0.080411435 | 0.096131723 | 0.69968437  | 0.402889771 | 0.922736622 | 0.764276114 | 1.114051399 | age1 sex bmi1 currrsmk1 | 1 |
| _320e     | 3766 | 53 | 3713 | 98.59267127 | 1 | -0.026822099 | 0.103300226 | 0.067419105 | 0.795132305 | 0.973534419 | 0.795100449 | 1.192011985 | age1 sex bmi1 currrsmk1 | 1 |
| _361_3p   | 2920 | 43 | 2877 | 98.52739726 | 1 | 0.015908061  | 0.116063698 | 0.018786318 | 0.890980849 | 1.016035267 | 0.809310517 | 1.275564376 | age1 sex bmi1 currrsmk1 | 1 |
| _361_5P   | 3732 | 54 | 3678 | 98.55305466 | 1 | -0.044155695 | 0.088330692 | 0.249890752 | 0.617152013 | 0.956804976 | 0.804704082 | 1.137655175 | age1 sex bmi1 currrsmk1 | 1 |
| _363_3p   | 3754 | 53 | 3701 | 98.58817262 | 1 | 0.000205406  | 0.076436085 | 7.22155E-06 | 0.997855852 | 1.000205427 | 0.861046673 | 1.161854437 | age1 sex bmi1 currrsmk1 | 1 |
| _374a_5p  | 3629 | 51 | 3578 | 98.59465417 | 1 | 0.039826391  | 0.095673568 | 0.173283802 | 0.677209727 | 1.040630096 | 0.862698202 | 1.255260524 | age1 sex bmi1 currrsmk1 | 1 |
| _39_3p    | 3921 | 55 | 3866 | 98.59729661 | 1 | -0.062574113 | 0.069436831 | 0.812100203 | 0.367500053 | 0.939343442 | 0.819822191 | 1.076289605 | age1 sex bmi1 currrsmk1 | 1 |
| _423_3p   | 3852 | 54 | 3798 | 98.59813084 | 1 | -0.088045196 | 0.080494248 | 1.196414425 | 0.274039499 | 0.915719489 | 0.782070005 | 1.072208597 | age1 sex bmi1 currrsmk1 | 1 |
| _423_5p   | 3693 | 54 | 3639 | 98.53777417 | 1 | -0.039263979 | 0.098794402 | 0.157951568 | 0.691049503 | 0.961496861 | 0.792234814 | 1.166921974 | age1 sex bmi1 currrsmk1 | 1 |
| _424_3p   | 3326 | 49 | 3277 | 98.52675887 | 1 | 0.096085329  | 0.099876119 | 0.925530744 | 0.336026958 | 1.100852995 | 0.905137633 | 1.338887338 | age1 sex bmi1 currrsmk1 | 1 |
| _424_5p   | 3791 | 54 | 3737 | 98.57557373 | 1 | -0.050345058 | 0.087661295 | 0.329835903 | 0.56575573  | 0.950901252 | 0.800788799 | 1.129153145 | age1 sex bmi1 currrsmk1 | 1 |
| _425_3p   | 3630 | 53 | 3577 | 98.5399449  | 1 | -0.098880987 | 0.092672154 | 1.138484378 | 0.285972814 | 0.90585051  | 0.75539456  | 1.08627357  | age1 sex bmi1 currrsmk1 | 1 |
| _425_5p   | 3784 | 54 | 3730 | 98.57293869 | 1 | -0.041863074 | 0.081640762 | 0.262934842 | 0.608111011 | 0.959001083 | 0.817196231 | 1.125412775 | age1 sex bmi1 currrsmk1 | 1 |
| _451a     | 3908 | 55 | 3853 | 98.5926305  | 1 | -0.004946905 | 0.063706122 | 0.006029826 | 0.938104912 | 0.995065311 | 0.878263506 | 1.127400792 | age1 sex bmi1 currrsmk1 | 1 |
| _484      | 3654 | 52 | 3602 | 98.57690203 | 1 | 0.011881008  | 0.092694158 | 0.016428648 | 0.898011047 | 1.011951867 | 0.843836771 | 1.213560036 | age1 sex bmi1 currrsmk1 | 1 |
| _486_5p   | 3893 | 55 | 3838 | 98.58720781 | 1 | -0.02863866  | 0.079784427 | 0.128845456 | 0.719632126 | 0.97176754  | 0.83109326  | 1.13625293  | age1 sex bmi1 currrsmk1 | 1 |
| _532_5p   | 3799 | 54 | 3745 | 98.57857331 | 1 | 0.034652719  | 0.088804842 | 0.152265444 | 0.696379751 | 1.035260121 | 0.869878639 | 1.232083959 | age1 sex bmi1 currrsmk1 | 1 |
| _652_3p   | 3793 | 54 | 3739 | 98.57632481 | 1 | -0.026834    | 0.087169149 | 0.094764399 | 0.758205401 | 0.973522833 | 0.82063045  | 1.15490073  | age1 sex bmi1 currrsmk1 | 1 |
| _660_5p   | 3834 | 54 | 3780 | 98.5915493  | 1 | -0.052222674 | 0.091286658 | 0.32726804  | 0.567272211 | 0.949117499 | 0.793627369 | 1.135071777 | age1 sex bmi1 currrsmk1 | 1 |
| _7b_3p    | 3357 | 50 | 3307 | 98.51057492 | 1 | -0.142698941 | 0.120178934 | 1.409888632 | 0.235074882 | 0.867015052 | 0.685062418 | 1.09729432  | age1 sex bmi1 currrsmk1 | 1 |
| _7b_5p    | 3013 | 41 | 2972 | 98.63923    | 1 | -0.036060965 | 0.093614425 | 0.14838471  | 0.700083791 | 0.964581486 | 0.802886543 | 1.1588405   | age1 sex bmi1 currrsmk1 | 1 |

## miRNA and breast cancer

|          |      |    |      |             |   |              |             |             |             |             |             |             |                         |   |
|----------|------|----|------|-------------|---|--------------|-------------|-------------|-------------|-------------|-------------|-------------|-------------------------|---|
| _7g_5p   | 3879 | 55 | 3824 | 98.58210879 | 1 | -0.081893834 | 0.082817347 | 0.977821944 | 0.322737125 | 0.921369771 | 0.783320884 | 1.083747762 | age1 sex bmi1 currrsmk1 | 1 |
| _7i_3p   | 3450 | 51 | 3399 | 98.52173913 | 1 | -0.026390119 | 0.100226851 | 0.069328934 | 0.792316368 | 0.973955057 | 0.800249971 | 1.185365183 | age1 sex bmi1 currrsmk1 | 1 |
| _7i_5p   | 2976 | 41 | 2935 | 98.62231183 | 1 | -0.015596622 | 0.096122786 | 0.026327426 | 0.871103252 | 0.984524375 | 0.81546741  | 1.188629041 | age1 sex bmi1 currrsmk1 | 1 |
| _92a_3p  | 3825 | 54 | 3771 | 98.58823529 | 1 | -0.017525916 | 0.0861184   | 0.041416133 | 0.83873679  | 0.98262677  | 0.8300122   | 1.163302621 | age1 sex bmi1 currrsmk1 | 1 |
| _93_3p   | 3252 | 45 | 3207 | 98.61623616 | 1 | -0.038657839 | 0.106334514 | 0.1321681   | 0.716194586 | 0.962079839 | 0.781086283 | 1.185013277 | age1 sex bmi1 currrsmk1 | 1 |
| _99b_5p  | 3061 | 48 | 3013 | 98.431885   | 1 | -0.016292159 | 0.104620193 | 0.024250811 | 0.876248436 | 0.98383984  | 0.801440961 | 1.207750636 | age1 sex bmi1 currrsmk1 | 1 |
| _1_5p    | 3703 | 53 | 3650 | 98.56872806 | 1 | -0.041103156 | 0.090001422 | 0.208569885 | 0.64789063  | 0.959730123 | 0.804525431 | 1.144876063 | age1 sex bmi1 currrsmk1 | 2 |
| _106a_5p | 2629 | 40 | 2589 | 98.47850894 | 1 | -0.058693512 | 0.100138333 | 0.34354171  | 0.557791979 | 0.942995742 | 0.774946691 | 1.147486634 | age1 sex bmi1 currrsmk1 | 2 |
| _122_5p  | 3893 | 54 | 3839 | 98.61289494 | 1 | -0.065615821 | 0.066538991 | 0.972444225 | 0.324071352 | 0.936490576 | 0.8219877   | 1.0669437   | age1 sex bmi1 currrsmk1 | 2 |
| _127_3p  | 2344 | 32 | 2312 | 98.63481229 | 1 | -0.085893907 | 0.107479181 | 0.638669269 | 0.424193085 | 0.917691587 | 0.74337903  | 1.132878135 | age1 sex bmi1 currrsmk1 | 2 |
| _128_3p  | 3794 | 54 | 3740 | 98.57670005 | 1 | -0.001116191 | 0.081791769 | 0.000186233 | 0.989111816 | 0.998884432 | 0.850930253 | 1.172563914 | age1 sex bmi1 currrsmk1 | 2 |
| _133a_3p | 3171 | 41 | 3130 | 98.70703248 | 1 | 0.040111946  | 0.094546391 | 0.179993801 | 0.671378568 | 1.040927295 | 0.864853133 | 1.252848134 | age1 sex bmi1 currrsmk1 | 2 |
| _134_5p  | 3063 | 51 | 3012 | 98.33496572 | 1 | -0.125807484 | 0.04127113  | 9.292236244 | 0.002301271 | 0.881784588 | 0.813265698 | 0.956076301 | age1 sex bmi1 currrsmk1 | 2 |
| _139_5p  | 2088 | 28 | 2060 | 98.65900383 | 1 | -0.069594855 | 0.090451695 | 0.591998833 | 0.441647222 | 0.932771651 | 0.781236842 | 1.113699337 | age1 sex bmi1 currrsmk1 | 2 |
| _142_3p  | 3779 | 54 | 3725 | 98.57105054 | 1 | -0.037386006 | 0.091573719 | 0.16667729  | 0.683081847 | 0.963304223 | 0.805036874 | 1.152686362 | age1 sex bmi1 currrsmk1 | 2 |
| _148b_3p | 3751 | 54 | 3697 | 98.5603839  | 1 | -0.012177178 | 0.084806586 | 0.020617412 | 0.885826096 | 0.987896664 | 0.83661187  | 1.166538335 | age1 sex bmi1 currrsmk1 | 2 |
| _151b    | 3129 | 47 | 3082 | 98.49792266 | 1 | 0.020205948  | 0.109681511 | 0.03393842  | 0.853837865 | 1.02041147  | 0.823027337 | 1.265133638 | age1 sex bmi1 currrsmk1 | 2 |
| _152_3p  | 3347 | 50 | 3297 | 98.50612489 | 1 | -0.040630488 | 0.110879867 | 0.13427609  | 0.714039    | 0.960183864 | 0.772633065 | 1.193261193 | age1 sex bmi1 currrsmk1 | 2 |
| _154_5p  | 3626 | 52 | 3574 | 98.56591285 | 1 | 0.03587452   | 0.066094626 | 0.294604852 | 0.587284632 | 1.036525775 | 0.91058451  | 1.179885744 | age1 sex bmi1 currrsmk1 | 2 |
| _155_5p  | 3265 | 49 | 3216 | 98.4992343  | 1 | -0.073879222 | 0.097519305 | 0.573935942 | 0.448699103 | 0.928783864 | 0.767195556 | 1.124406235 | age1 sex bmi1 currrsmk1 | 2 |
| _16_2_3p | 3853 | 54 | 3799 | 98.59849468 | 1 | -0.08643265  | 0.081596347 | 1.122055216 | 0.289476343 | 0.91719732  | 0.781641916 | 1.076261273 | age1 sex bmi1 currrsmk1 | 2 |
| _17_5p   | 3869 | 55 | 3814 | 98.57844404 | 1 | -0.005585136 | 0.062062046 | 0.008098701 | 0.92829295  | 0.994430432 | 0.88053596  | 1.123056784 | age1 sex bmi1 currrsmk1 | 2 |
| _181b_5p | 3811 | 53 | 3758 | 98.6092889  | 1 | -0.114375848 | 0.098837634 | 1.339133809 | 0.247186781 | 0.891922666 | 0.734846203 | 1.082574883 | age1 sex bmi1 currrsmk1 | 2 |
| _186_5p  | 3873 | 55 | 3818 | 98.57991221 | 1 | 0.003426881  | 0.066901794 | 0.002623751 | 0.959148175 | 1.00343276  | 0.880118937 | 1.144024132 | age1 sex bmi1 currrsmk1 | 2 |
| _193a_5p | 3789 | 55 | 3734 | 98.54842966 | 1 | -0.039485993 | 0.093374474 | 0.178825644 | 0.672384412 | 0.961283419 | 0.80051773  | 1.154335221 | age1 sex bmi1 currrsmk1 | 2 |
| _193b_3p | 2425 | 29 | 2396 | 98.80412371 | 1 | 0.004222577  | 0.107712239 | 0.001536827 | 0.968729032 | 1.004231504 | 0.813109466 | 1.240276932 | age1 sex bmi1 currrsmk1 | 2 |
| _195_5p  | 3762 | 53 | 3709 | 98.59117491 | 1 | 0.037174039  | 0.092762071 | 0.160597444 | 0.68860706  | 1.037873636 | 0.865336977 | 1.244811805 | age1 sex bmi1 currrsmk1 | 2 |
| _200a_3p | 3466 | 48 | 3418 | 98.61511829 | 1 | -0.152823661 | 0.092764986 | 2.714019951 | 0.099470046 | 0.858281057 | 0.715595874 | 1.02941674  | age1 sex bmi1 currrsmk1 | 2 |
| _204_5p  | 3711 | 53 | 3658 | 98.57181353 | 1 | -0.052390115 | 0.067994384 | 0.59368027  | 0.4409995   | 0.948958592 | 0.830558711 | 1.084236908 | age1 sex bmi1 currrsmk1 | 2 |
| _205_5p  | 3387 | 49 | 3338 | 98.553292   | 1 | -0.124777447 | 0.064505851 | 3.741743184 | 0.053069053 | 0.882693327 | 0.777861655 | 1.001653062 | age1 sex bmi1 currrsmk1 | 2 |
| _210_3p  | 3697 | 53 | 3644 | 98.56640519 | 1 | -0.064338248 | 0.078043103 | 0.67962509  | 0.409715853 | 0.937687775 | 0.804688592 | 1.092669105 | age1 sex bmi1 currrsmk1 | 2 |
| _28_3p   | 3736 | 53 | 3683 | 98.58137045 | 1 | 0.03346126   | 0.078577644 | 0.181337067 | 0.670226696 | 1.034027385 | 0.886434456 | 1.206194802 | age1 sex bmi1 currrsmk1 | 2 |
| _28_5p   | 2682 | 37 | 2645 | 98.62043251 | 1 | 0.022477636  | 0.118839534 | 0.03577498  | 0.849980936 | 1.022732162 | 0.810224775 | 1.290976415 | age1 sex bmi1 currrsmk1 | 2 |
| _301a_3p | 3124 | 47 | 3077 | 98.49551857 | 1 | 0.003152241  | 0.090823901 | 0.001204588 | 0.972313244 | 1.003157214 | 0.839575112 | 1.198611514 | age1 sex bmi1 currrsmk1 | 2 |
| _301b_3p | 2133 | 23 | 2110 | 98.92170652 | 1 | -0.133956706 | 0.134278604 | 0.995211269 | 0.318472022 | 0.87462793  | 0.672241295 | 1.137945589 | age1 sex bmi1 currrsmk1 | 2 |
| _31_5p   | 2792 | 43 | 2749 | 98.45988539 | 1 | -0.067213284 | 0.056320607 | 1.424215107 | 0.232710861 | 0.93499576  | 0.837277565 | 1.044118591 | age1 sex bmi1 currrsmk1 | 2 |
| _324_5p  | 3701 | 53 | 3648 | 98.56795461 | 1 | -0.011892145 | 0.082897631 | 0.020579563 | 0.885930227 | 0.988178287 | 0.839987292 | 1.162513215 | age1 sex bmi1 currrsmk1 | 2 |
| _335_5p  | 3739 | 53 | 3686 | 98.58250869 | 1 | -0.103099983 | 0.091292107 | 1.275412669 | 0.258753717 | 0.90203678  | 0.75425164  | 1.078778367 | age1 sex bmi1 currrsmk1 | 2 |
| _338_3p  | 3517 | 50 | 3467 | 98.57833381 | 1 | -0.056729803 | 0.099841786 | 0.322847831 | 0.569901208 | 0.94484933  | 0.776921388 | 1.149074115 | age1 sex bmi1 currrsmk1 | 2 |
| _339_3p  | 2878 | 42 | 2836 | 98.54065323 | 1 | -0.038100247 | 0.107430128 | 0.125777624 | 0.722850755 | 0.962616437 | 0.779845521 | 1.188223026 | age1 sex bmi1 currrsmk1 | 2 |
| _339_5p  | 3438 | 49 | 3389 | 98.57475276 | 1 | -0.11795424  | 0.078311763 | 2.268679324 | 0.132012357 | 0.888736721 | 0.762279133 | 1.036172872 | age1 sex bmi1 currrsmk1 | 2 |
| _342_3p  | 3880 | 54 | 3826 | 98.60824742 | 1 | -0.047135095 | 0.083861845 | 0.315907511 | 0.574077523 | 0.953958514 | 0.809368236 | 1.124379244 | age1 sex bmi1 currrsmk1 | 2 |

miRNA and breast cancer

|          |      |    |      |             |   |              |             |             |             |             |             |             |                         |   |
|----------|------|----|------|-------------|---|--------------|-------------|-------------|-------------|-------------|-------------|-------------|-------------------------|---|
| _34a_5p  | 3236 | 50 | 3186 | 98.45488257 | 1 | -0.03937685  | 0.097964804 | 0.161562954 | 0.687721601 | 0.961388342 | 0.79343446  | 1.164894633 | age1 sex bmi1 currrsmk1 | 2 |
| _365a_3p | 2963 | 41 | 2922 | 98.6162673  | 1 | -0.096440783 | 0.125688726 | 0.588747135 | 0.442904003 | 0.908063669 | 0.709789977 | 1.161723402 | age1 sex bmi1 currrsmk1 | 2 |
| _374b_5p | 3650 | 53 | 3597 | 98.54794521 | 1 | -0.059634972 | 0.097421606 | 0.374706717 | 0.540449816 | 0.942108366 | 0.778350913 | 1.140318793 | age1 sex bmi1 currrsmk1 | 2 |
| _375_3p  | 3734 | 54 | 3680 | 98.55382967 | 1 | -0.119194442 | 0.078942239 | 2.279781017 | 0.131070379 | 0.88763519  | 0.760394131 | 1.036168217 | age1 sex bmi1 currrsmk1 | 2 |
| _376a_3p | 3825 | 54 | 3771 | 98.58823529 | 1 | 0.000557932  | 0.067494595 | 6.83321E-05 | 0.993404502 | 1.000558088 | 0.876578478 | 1.142072858 | age1 sex bmi1 currrsmk1 | 2 |
| _378a_3p | 3540 | 51 | 3489 | 98.55932203 | 1 | -0.061857241 | 0.103545223 | 0.356878963 | 0.55024471  | 0.940017073 | 0.767357758 | 1.151525595 | age1 sex bmi1 currrsmk1 | 2 |
| _382_5p  | 3734 | 51 | 3683 | 98.63417247 | 1 | -0.057837633 | 0.071936723 | 0.646427336 | 0.421392903 | 0.943803178 | 0.819688393 | 1.086711055 | age1 sex bmi1 currrsmk1 | 2 |
| _421     | 3323 | 50 | 3273 | 98.49533554 | 1 | -0.041514508 | 0.102765784 | 0.163193447 | 0.686233245 | 0.959335417 | 0.784325047 | 1.173396726 | age1 sex bmi1 currrsmk1 | 2 |
| _431_5p  | 2644 | 36 | 2608 | 98.63842663 | 1 | -0.136763887 | 0.059596248 | 5.266293208 | 0.021742263 | 0.872176134 | 0.776025122 | 0.980240443 | age1 sex bmi1 currrsmk1 | 2 |
| _483_3p  | 3007 | 43 | 2964 | 98.57000333 | 1 | 0.001929638  | 0.109773787 | 0.000308997 | 0.985975258 | 1.001931501 | 0.807975913 | 1.24244636  | age1 sex bmi1 currrsmk1 | 2 |
| _485_3p  | 3509 | 49 | 3460 | 98.60359077 | 1 | -0.079404989 | 0.054600553 | 2.114956829 | 0.145866167 | 0.923665774 | 0.829924865 | 1.027994819 | age1 sex bmi1 currrsmk1 | 2 |
| _494_3p  | 3315 | 48 | 3267 | 98.5520362  | 1 | 0.06063275   | 0.084513344 | 0.514711608 | 0.473106319 | 1.062508636 | 0.900315195 | 1.253921525 | age1 sex bmi1 currrsmk1 | 2 |
| _495_3p  | 3671 | 51 | 3620 | 98.61073277 | 1 | -0.060078109 | 0.071938314 | 0.69744826  | 0.403642446 | 0.941690976 | 0.817851406 | 1.084282411 | age1 sex bmi1 currrsmk1 | 2 |
| _499a_5p | 3394 | 51 | 3343 | 98.49734826 | 1 | 0.015078748  | 0.094283888 | 0.025577353 | 0.872936836 | 1.015193006 | 0.843905906 | 1.22124615  | age1 sex bmi1 currrsmk1 | 2 |
| _500a_5p | 2903 | 39 | 2864 | 98.65656218 | 1 | 0.035332157  | 0.099136009 | 0.127021556 | 0.721540403 | 1.035963754 | 0.853021223 | 1.258140912 | age1 sex bmi1 currrsmk1 | 2 |
| _502_3p  | 2367 | 32 | 2335 | 98.64807774 | 1 | -0.025857528 | 0.144413566 | 0.032059594 | 0.857896926 | 0.974473915 | 0.734252051 | 1.293288061 | age1 sex bmi1 currrsmk1 | 2 |
| _505_3p  | 3466 | 49 | 3417 | 98.58626659 | 1 | -0.163432276 | 0.058211864 | 7.882294348 | 0.004992111 | 0.84922401  | 0.757656295 | 0.951858281 | age1 sex bmi1 currrsmk1 | 2 |
| _532_3p  | 2436 | 34 | 2402 | 98.60426929 | 1 | 0.015974601  | 0.104121045 | 0.023538727 | 0.878064425 | 1.016102877 | 0.828532763 | 1.246136667 | age1 sex bmi1 currrsmk1 | 2 |
| _543     | 3747 | 54 | 3693 | 98.55884708 | 1 | -0.109248065 | 0.055479559 | 3.877586649 | 0.048934851 | 0.896507998 | 0.804136698 | 0.999490002 | age1 sex bmi1 currrsmk1 | 2 |
| _584_5p  | 3773 | 53 | 3720 | 98.59528227 | 1 | -0.120150701 | 0.083013629 | 2.094854251 | 0.147795805 | 0.886786787 | 0.75362949  | 1.043471383 | age1 sex bmi1 currrsmk1 | 2 |
| _590_3p  | 3402 | 52 | 3350 | 98.47148736 | 1 | -0.002843303 | 0.085512403 | 0.001105363 | 0.973477624 | 0.997161007 | 0.843290093 | 1.179107975 | age1 sex bmi1 currrsmk1 | 2 |
| _590_5p  | 3431 | 52 | 3379 | 98.48440688 | 1 | -0.015636957 | 0.091962747 | 0.028912164 | 0.864982005 | 0.984484666 | 0.822110365 | 1.178929373 | age1 sex bmi1 currrsmk1 | 2 |
| _625_3p  | 3617 | 53 | 3564 | 98.53469726 | 1 | -0.060674565 | 0.075376949 | 0.647942148 | 0.420849378 | 0.941129466 | 0.811873555 | 1.090963816 | age1 sex bmi1 currrsmk1 | 2 |
| _629_5p  | 3553 | 50 | 3503 | 98.59273853 | 1 | 0.033577847  | 0.100187865 | 0.112324744 | 0.737512813 | 1.034147945 | 0.849772375 | 1.258527583 | age1 sex bmi1 currrsmk1 | 2 |
| _656_3p  | 2774 | 39 | 2735 | 98.59408796 | 1 | 0.060564981  | 0.094290805 | 0.412576495 | 0.520664667 | 1.062436633 | 0.883166441 | 1.278096118 | age1 sex bmi1 currrsmk1 | 2 |
| _7_5p    | 2757 | 36 | 2721 | 98.69423286 | 1 | 0.006578511  | 0.119225966 | 0.003044483 | 0.955997588 | 1.006600197 | 0.796841024 | 1.271576043 | age1 sex bmi1 currrsmk1 | 2 |
| _7a_5p   | 2614 | 33 | 2581 | 98.73756695 | 1 | -0.138237408 | 0.061509586 | 5.050862605 | 0.024613682 | 0.870891911 | 0.77198205  | 0.982474554 | age1 sex bmi1 currrsmk1 | 2 |
| _885_5p  | 2955 | 39 | 2916 | 98.68020305 | 1 | -0.116249365 | 0.063306618 | 3.371964173 | 0.066314649 | 0.890253197 | 0.786369845 | 1.007860056 | age1 sex bmi1 currrsmk1 | 2 |
| _92b_3p  | 3910 | 54 | 3856 | 98.61892583 | 1 | -0.061409903 | 0.08246052  | 0.554606148 | 0.456441708 | 0.940437673 | 0.800091204 | 1.105402749 | age1 sex bmi1 currrsmk1 | 2 |
| _95_3p   | 2997 | 48 | 2949 | 98.3983984  | 1 | 0.099113075  | 0.095691327 | 1.07279501  | 0.300314972 | 1.104191149 | 0.915359422 | 1.331977432 | age1 sex bmi1 currrsmk1 | 2 |
| _1260a   | 3744 | 53 | 3691 | 98.58440171 | 1 | -0.117488354 | 0.135141768 | 0.755806187 | 0.384644161 | 0.889150867 | 0.682248476 | 1.158799604 | age1 sex bmi1 currrsmk1 | 3 |
| _1290    | 3290 | 48 | 3242 | 98.54103343 | 1 | 0.035041286  | 0.10536784  | 0.110597144 | 0.739465318 | 1.035662466 | 0.842420582 | 1.273231882 | age1 sex bmi1 currrsmk1 | 3 |
| _136_3p  | 2461 | 38 | 2423 | 98.45591223 | 1 | 0.077561258  | 0.122289973 | 0.402261061 | 0.525923855 | 1.080648429 | 0.850336875 | 1.373339275 | age1 sex bmi1 currrsmk1 | 3 |
| _30a_3p  | 2640 | 39 | 2601 | 98.52272727 | 1 | 0.033994231  | 0.122869265 | 0.076546252 | 0.78203356  | 1.034578639 | 0.813161857 | 1.316285251 | age1 sex bmi1 currrsmk1 | 3 |
| _30b_5p  | 2752 | 40 | 2712 | 98.54651163 | 1 | -0.018702199 | 0.124502639 | 0.022564632 | 0.880594767 | 0.981471601 | 0.768954955 | 1.252721631 | age1 sex bmi1 currrsmk1 | 3 |
| _3135b   | 3570 | 53 | 3517 | 98.51540616 | 1 | -0.057388978 | 0.113822631 | 0.254214164 | 0.614123263 | 0.944226715 | 0.755423142 | 1.180218131 | age1 sex bmi1 currrsmk1 | 3 |
| _340_5p  | 3745 | 54 | 3691 | 98.55807744 | 1 | 0.025067011  | 0.089662729 | 0.0781594   | 0.779807406 | 1.025383831 | 0.860132607 | 1.222383609 | age1 sex bmi1 currrsmk1 | 3 |
| _369_3p  | 3672 | 53 | 3619 | 98.55664488 | 1 | -0.016169646 | 0.073709078 | 0.04812371  | 0.826360927 | 0.98396038  | 0.85160133  | 1.136891167 | age1 sex bmi1 currrsmk1 | 3 |
| _376_3p  | 3791 | 54 | 3737 | 98.57557373 | 1 | -0.046876726 | 0.070009409 | 0.448334054 | 0.503127149 | 0.954205019 | 0.831858731 | 1.094545484 | age1 sex bmi1 currrsmk1 | 3 |
| _4306    | 2990 | 43 | 2947 | 98.56187291 | 1 | 0.043243053  | 0.112440941 | 0.147905303 | 0.700545216 | 1.044191658 | 0.837664898 | 1.301637708 | age1 sex bmi1 currrsmk1 | 3 |
| _582_5p  | 2168 | 37 | 2131 | 98.29335793 | 1 | 0.036210178  | 0.140981797 | 0.065968291 | 0.797300027 | 1.036873752 | 0.786542071 | 1.366878157 | age1 sex bmi1 currrsmk1 | 3 |
| _744_5p  | 3055 | 45 | 3010 | 98.52700491 | 1 | -0.053980934 | 0.105426366 | 0.262169588 | 0.608633521 | 0.947450171 | 0.770579219 | 1.164918289 | age1 sex bmi1 currrsmk1 | 3 |
